# Supplementary material for: Health-related quality of life in patients with autoimmune hepatitis: A questionnaire survey
Source: PLoS One. 2018 Oct 4;13(10):e0204772. doi: 10.1371/journal.pone.0204772 (PMC6171853; doi:10.1371/journal.pone.0204772)
Supplement: S1 File — (XLSX) [file pone.0204772.s002.xlsx]

## Sheet: Sheet1
GROUP	patient No	age	sex 1:M 2:F	BMI	AST	ALT	ALP	PLT	Use of PSL	dosage of PSL	Cirroris	comorbidities	CLDQ	Overall	abdominal	fatigue	sysytemic	activity	emotions	worry	SF-36	PF	RP	BP	GH	VT	SF	RE	MH	PCS	MCS	RCS	LC
AIH	1	56	2	27.8	55	60	257	21.3	1	6	0	1		6.7931	7	7	7	7	7	5.8		100	100	100	72	100	100	100	100	53.0701	65.3768	52.9458	0
	2	59	2	31.2	22	23	258	18.7	0		0	1		5.37931	6.33333	5	4.6	6	5.5	5.4		95	100	84	62	75	87.5	100	80	52.6099	52.0813	54.5992	0
	3	50	2	20.6	40	31	185	18.5	1	7.5	0	0		4.86207	4	5.6	4.8	6.33333	4.875	3.8		85	93.75	84	52	56.25	50	100	50	57.0911	39.7075	46.5029	0
	4	70	2	25.2	44	62	253	20.4	1	10	0	1		4.62069	6	4.2	4.8	4.66667	4.375	4.4		85	56.25	70	45	6.25	50	41.6667	45	56.1452	34.384	26.6755	0
	5	84	2	29.5	20	18	300	12.9	1	10	0	1		3.2069	3.66667	2.4	4	3.66667	2.5	3.8		20	50	84	57	56.25	100	50	60	14.874	64.5785	40.1224	0
	6	67	2	25.1	14	9	218	21.8	1	2.5	0	0		6.06897	6.33333	6.2	6.2	6	6	5.8		95	100	100	.	50	100	100	60	.	.	.	0
	7	63	2	22.4	22	13	234	21.8	1	3	0	1		6.62069	7	5.8	6.6	7	6.625	7		85	87.5	100	77	68.75	87.5	83.3333	85	52.41	60.133	43.5835	0
	8	62	2	27.6	17	10	252	21.8	1	2.5	0	0		6.03448	6.66667	5.4	6.2	6.66667	5.875	6		100	93.75	84	57	81.25	100	91.6667	85	50.7859	55.1129	54.3857	0
	9	78	2	27.2	27	30	322	9.1	1	5	0	1		6.10345	7	6	6.4	5.66667	6.25	5.4		35	50	74	35	56.25	100	91.6667	65	12.3712	55.6787	57.5523	0
	10	66	2	23.7	18	13	523	16.7	0		0	1		6.06897	7	6.2	6	6.33333	6	5.4		65	62.5	62	57	81.25	100	100	90	24.7791	63.9212	55.9291	0
	11	68	2	24.8	26	24	268	12.3	1	5	0	1		4.70588	5.66667	3.6	3.5	3.66667	6	3		75	56.25	74	81.25	62.5	75	58.3333	60	48.7989	59.2494	27.6388	0
	12	59	2	31.2	22	21	243	16.2	0		0	1		5.27586	6	5	4.8	5.66667	5.25	5.4		95	100	84	52	56.25	62.5	100	70	57.1936	42.5425	51.1849	0
	13	64	2	23.5	29	27	216	18.5	1	10	0	1		5.57143	6.5	5.6	5.8	5.33333	5.5	5.2		80	100	100	52	87.5	100	100	90	41.6421	59.343	59.5636	0
	14	38	2	19.5	18	15	148	19.6	1	12.5	0	0		5.68966	6.33333	5.4	6.2	6.33333	5.25	5.4		100	100	100	52	68.75	100	100	70	55.8185	47.1305	57.8349	0
	15	53	2	21.4	27	26	261	21.1	1	5	0	1		5.41379	5.66667	5	5.4	5.33333	5.5	5.6		35	37.5	32	42	62.5	75	100	85	4.8262	60.7686	54.2783	0
	16	50	2	18.7	46	36	162	13.8	1	5	0	1		4.75862	6.33333	4.8	5	5.66667	4.625	3.2		90	75	62	37	56.25	100	75	70	40.9975	46.0002	53.6586	0
	17	71	2	30.5	61	105	174	19.9	1	5	0	1		6.06897	6.66667	6	5.8	7	6	5.6		85	75	100	57	62.5	100	83.3333	75	47.0535	54.8775	48.3846
	18	75	2	24.3	20	15	143	22.5	1	10	0	1		5.96552	7	6.2	6.2	6.66667	5.625	5		100	100	100	47	75	100	100	80	52.7828	50.1093	59.0792	0
	19	52	1	19.5	16	11	254	22.9	1	10	0	1		6.65517	7	7	5.8	7	7	6.2		85	75	61	45	81.25	100	100	85	34.425	55.7229	59.2169	0
	20	50	2	22.1	16	16	212	24.2	1	8	0	1		4.24138	5	4.4	4	5	4.625	2.8		95	100	72	47	56.25	100	100	60	50.046	39.7613	62.4292	0
	21	41	2	24.9	21	17	283	12.3	0		1	1		4.24138	5	4.4	4	5	4.625	2.8		95	100	72	47	56.25	100	100	60	50.046	39.7613	62.4292	1
	22	54	2	24.9	27	42	187	16.2	1	10	0	0		5.27586	6	5.6	6	6	4.875	4		100	87.5	100	47	50	100	100	55	56.8316	39.9768	56.6942	0
	23	73	2	20.2	18	11	158	17.5	1	5	0	1		4.82759	6.66667	4.6	4.6	6.33333	3.375	5.6		85	100	100	72	43.75	75	100	35	63.6812	37.7618	48.2014	0
	24	72	2	25.4	34	52	306	19.4	1	10	0	1		5.55172	6	5.2	4.6	5.66667	5.875	6		50	75	41	40	56.25	75	75	70	22.4494	50.2153	52.4561	0
	25	75	2	20	23	9	176	21.5	1	5	0	1		6.2069	7	5.8	6.2	6.66667	5.625	6.8		90	100	100	62	75	87.5	100	75	53.7087	52.6702	53.2368	0
	26	56	2	31.4	43	38	414	19.1	1	2	0	1		4.96552	6	4.4	3.6	6	5.5	4.8		80	81.25	80	45	50	100	66.6667	80	40.4899	50.7478	50.849	0
	27	40	2	21.9	26	23	205	38.1	1	7	0	1		4.58621	6.66667	4.4	5.4	6	4.25	2.4		95	100	100	47	81.25	100	100	70	51.8407	49.9463	58.5747	0
	28	33	2	25.9	44	66	360	27.2	1	3	0	1		4.93103	6.66667	3.8	5	6.66667	4	5.4		100	100	72	55	43.75	62.5	75	65	61.4524	39.3323	44.1579	0
	29	57	1	21	18	8	133	17	0		0	1		4.82759	5.33333	4.4	5	5.66667	4.375	5		95	100	74	52	37.5	62.5	83.3333	40	62.8681	31.5385	46.6775	0
	30	61	2	25.5	40	23	265	3	0		1	1		4.86207	6.33333	4.8	4.8	4.33333	4.125	5.6		70	43.75	74	62	62.5	62.5	33.3333	80	41.2742	64.6179	20.0171	1
	31	73	2	19.5	30	21	247	31.8	1	2	0	1		5.62069	7	5.4	5.4	4.33333	5.875	5.6		75	56.25	100	42	62.5	87.5	50	75	41.327	58.5233	35.2979	0
	32	35	2	20	15	8	130	6.9	1	3	0	1		4.96552	5.33333	4.2	5.4	6	4.875	4.6		95	93.75	100	52	31.25	100	91.6667	55	57.5115	36.8927	56.1195	0
	33	48	1	21.8	38	22	560	23.9	0		0	1		5.10345	6	4.8	4.4	6	5.125	5		95	100	52	42	56.25	75	100	70	47.9193	39.0754	59.6935	0
	34	86	2	22.2	33	17	231	23.4	0		0	1		4.86207	5.66667	5.2	4.4	5	4.25	5.4		60	75	31	52	62.5	87.5	75	70	25.8025	52.1771	52.5715	0
	35	75	2	26.5	31	25	245		0		0	0		6.37931	6.66667	6.4	6.4	6.66667	6	6.6		95	100	100	62	87.5	100	100	90	50.9678	58.9341	55.9279	0
	36	67	1	27.9	32	28	125	23.3	1	2	0	1		5.65517	7	6.6	6.2	4.66667	5.25	4.6		95	100	100	97	100	100	100	100	55.5468	70.6365	47.8601
	37	73	1	22.7	40	24	253	4.9	0		0	1		3.89655	4.66667	4.4	4.2	3.33333	4.125	2.6		70	62.5	41	30	43.75	50	50	50	38.647	40.577	35.8756	0
	38	77	2	20.6	43	42		9.6	1	7.5	0	0		6.17241	7	7	5.6	6	5.875	6		100	100	84	52.5	75	100	100	85	50.3167	51.254	59.6902	0
	39	63	1		24	24	208	17	0		0	1		5.93103	6	5.8	5.8	6	6	6		95	100	100	82	68.75	100	100	70	59.2809	53.2943	51.6379	0
	40	81	2	23.4	20	13	325	29.6	0		0	0		5	5	5	4.8	5.33333	4.75	5.4		75	75	42	57	56.25	62.5	.	55	.	.	.	0
	41	59	2	22.1	44	47	510	23.3	1	5	0	1		5.10345	4.66667	4.6	5.2	5	5.375	5.4		90	100	62	35	50	75	91.6667	65	47.5045	37.1651	58.3513	0
	42	53	2	20.9	29	16	425	15.6	0		0	1		5.27586	6	4.8	6	5.66667	4.5	5.6		90	75	100	67	75	50	75	70	60.3472	56.6474	29.3373	0
	43	89	2	19.5	29	15	189	17.2	0		0	0		6.10345	7	4.6	6.4	5.66667	6.375	6.6		50	56.25	100	87	56.25	75	58.3333	65	41.3789	65.39	26.8854	0
	44	69	1	23.7	26	21	247	13.6	1	3	0	1		5.86207	6.66667	5.8	6	7	5	6		85	75	100	52	68.75	100	83.3333	55	49.3568	50.6788	47.9661	0
	45	57	2	24	18	9	239	19.1	1	5	0	1		5.68966	6.33333	5.6	5.4	6.66667	5.375	5.6		90	100	84	57	43.75	75	75	45	60.5163	37.6049	45.553	0
	46	67	2	18.6	23	11	192	12.8	1	2	0	1		4.34483	4.66667	2.8	4.4	5	4.5	5		50	37.5	41	50	37.5	50	50	60	28.3104	51.673	28.9207	0
	47	58	2	27.4	51	12	435	6.3	1	20	1	1		2.44828	5.66667	2.2	1.6	3.33333	1.75	2.2		65	37.5	41	0	31.25	50	25	37.5	31.8638	35.4892	30.1733	1
	48	82	2	21.7	34	9	171	19.9	1	2	0	0		5.17857	5.66667	5.2	4.8	5.33333	5.42857	4.8		75	75	100	42	75	87.5	83.3333	80	39.7451	57.387	48.9219	0
	49	69	2	22.4	16	7	325	20.3	0		0	1		5.55172	6	5	5.4	5.66667	5.5	6		60	56.25	31	47	37.5	50	50	55	34.0719	45.0865	33.3679	0
	50	51	2	32	29	37	138	16	1	6	0	1		4.37931	5.33333	4.8	4.6	4.66667	3.875	3.8		90	93.75	80	52	56.25	62.5	91.6667	60	55.7093	42.1822	47.6078	0
	51	74	2	30.2	42	33	312	16	0		0	1		5.17241	5.33333	4.6	6	6	4.375	5.6		95	75	100	50	62.5	87.5	91.6667	55	55.5244	46.2659	47.2573
	52	35	2	19.2	15	9	142	22.8	1	3	0	1		4.24138	4.66667	3.6	5.2	4.33333	5.875	1		90	75	51	27	25	37.5	75	40	53.7985	26.6762	41.5285	0
	53	67	2	22.3	24	16	229	9.3	0		0	1		5.89655	5.66667	5.2	6.2	5.66667	5.875	6.6		90	100	72	57	62.5	100	100	90	43.9564	50.9766	61.919	0
	54	75	2	23.1	30	17	218	18.1	1	5	0	1		4.75862	5	4.2	4.8	5.66667	4.875	4.4		65	56.25	52	45	75	87.5	66.6667	85	25.5263	61.4803	45.0349	0
	55	44	2	23.5	14	13	199	2	0		0	1		4.62069	3.66667	4.2	5.2	5.66667	3.75	5.8		70	87.5	74	45	37.5	50	50	40	52.1052	37.9428	34.568
	56	85	2	25.8	18	12	288	11.3	0		1	1		4.34483	6	2	5.2	1.66667	4.75	5.8		90	62.5	42	95	75	100	100	60	46.8111	57.1218	45.8315	1
	57	73	2	23.6	18	9	164	27.2	0		0	1		5.65517	5.66667	5.8	5.8	5.66667	5.75	5.2		80	81.25	62	52	87.5	100	66.6667	95	34.5848	63.3683	49.3474	0
	58	80	2	25.5	27	18	224	15	0		0	1		5.93103	5.66667	6.2	6.4	6.33333	5.875	5.2		60	81.25	100	52	87.5	87.5	91.6667	85	33.0788	64.0349	51.4298	0
	59	39	2	18.4	17	14	173	23	1	5	0	1		5.06897	4.33333	4	6.6	6.66667	4.125	5.6		100	100	100	81.25	68.75	100	100	65	62.4743	51.2234	51.0565	0
	60	39	2	27.5	25	15	182	11.2	1	7.5	1	0		6.41379	6.66667	6.4	6.6	6.66667	6.5	5.8		100	100	84	47	68.75	100	100	85	49.5029	48.769	61.334	1
	61	58	2	20.1	21	16	115	14.7	1	10	0	0		5.58621	6	5	5.6	6.33333	5.375	5.8		95	87.5	62	52	68.75	100	83.3333	80	44.9738	50.8869	54.7905	0
	62	75	2	32	61	49	237	13.7	1	5	0	0		6.13793	6.66667	5.8	5.8	6.66667	6.25	6		65	43.75	84	57	56.25	100	50	75	33.5267	62.4212	35.3723	0
	63	78	2	21.8	22	52	225	17.4	1	30	0	0		5.27586	6.33333	5.2	5.8	6	5	4.2		80	93.75	100	55	62.5	100	100	65	47.0233	48.8477	57.8541	0
	64	68	2	21.4	17	15	181	15.1	1	12.5	0	1		5.41379	6	4.6	6	5	5.5	5.4		90	12.5	84	45	50	25	33.3333	75	53.0637	58.2909	5.27296	0
	65	74	2	17.8	33	33	177	14.7	1	5	0	1		4.2069	5.33333	3.8	3.8	3.66667	4.375	4.4		40	12.5	61	57	37.5	12.5	16.6667	45	36.139	57.0544	0.478406	0
	66	66	2	25.3	16	11	145	14.6	1	10	0	0		5	5.66667	4.8	5.6	6	4.625	4.2		65	100	84	25	43.75	62.5	100	65	38.593	37.9172	60.5779	0
	67	65	2	19.3	19	12	182	10.5	1	10	0	0		5.24138	4.66667	5	4.8	6	5.625	5.2		95	81.25	52	52	75	87.5	83.3333	90	42.5021	54.5881	51.3805	0
	68	22	2	20	14	7	93	23.3	1	20	0	0		6.06897	6	6	7	5.66667	6.125	5.4		100	87.5	100	77	81.25	75	83.3333	95	59.426	62.856	38.7087	0
	69	53	2	29.6	19	10	258	23.1	1	10	1	0		4.86207	6.33333	3.8	5.8	4.66667	4.375	5		65	68.75	100	52	50	100	75	70	37.5451	54.3071	48.0627	1
	70	74	2	24.2	25	14	117	20.1	1	7.5	0	0		5.68966	6.33333	5.6	5.6	5.66667	5.75	5.4		80	93.75	84	62	75	87.5	83.3333	80	45.7015	56.5025	49.5887	0
	71	66	2	24.6	19	14	145	18.7	1	5	0	0		5.48276	6	5.8	5.6	5.66667	5.125	5.2		100	100	100	52	75	100	100	65	56.438	47.4247	57.1365	0
	72	48	2	20.6	13	12	126	21.1	1	7.5	0	0		3.62069	3.66667	3.4	4	4.66667	2.5	4.6		70	75	62	45	37.5	87.5	75	40	40.9009	38.3207	50.1925	0
	73	45	2	18.3	14	8	92	35.5	1	7.5	0	1		4.86207	2.66667	4.2	5.6	6	5.25	4.8		100	87.5	84	45	50	87.5	100	50	56.6488	36.9395	55.2446	0
	74	52	2	18.8	16	13	150	15.2	1	5	0	0		5.10345	4.66667	5	6	5	4.875	5		95	100	74	57	56.25	75	75	55	58.9845	41.5855	45.7662	0
	75	54	2	21.3	18	9	122	14.3	1	10	0	1		5.34483	5.33333	5	6	5.33333	5.125	5.4		90	100	61	40	43.75	75	100	40	52.4499	29.8828	58.9135	0
	76	68	2	23.4	34	49	237	12.7	1	12.5	0	1		5.82759	6.66667	6	5	5.33333	5.875	6.2		45	62.5	52	47	68.75	87.5	58.3333	90	16.8298	64.2479	45.9746	0
	77	66	2	28	20	14	209	19.3	1	7.5	0	1		6.17241	6.66667	6	6	6.33333	6.5	5.6		90	100	84	62	75	100	100	100	44.6169	58.0387	59.3521	0
	78	32	2	21.1	24	32	214	29.7	1	10	0	0		3.62069	4.33333	3	3.6	5	2.375	5		90	56.25	52	25	18.75	37.5	66.6667	15	56.6607	22.2735	34.3439	0
	79	66	2	21.5	15	10	109	19.5	1	10	0	0		5.92857	6	6	6	6	6.14286	5.4		100	100	100	52	.	100	100	100	.	.	.	0
	80	83	2	23.3	18	11	235	23.7	1	5	0	0		5.27586	5.66667	4.2	5	5.66667	5.375	6		40	75	62	52	56.25	75	75	85	20.7343	58.825	49.5197	0
	81	81	2	24.4	16	13	132	23.4	1	7.5	0	0		5.58621	6.33333	5.6	5.2	6.33333	5.125	5.8		75	100	100	52	68.75	100	100	95	39.112	56.8069	61.5758	0
	82	59	2	23.5	26	25	108	26.5	1	7.5	0	0		6.55172	7	6.2	6.2	5.66667	6.875	7		95	100	100	92	81.25	100	100	90	57.152	62.8685	49.6811	0
	83	75	2	25.2	21	14	249	18.9	1	2.5	0	0		4.7931	7	4.8	5.6	5.33333	3	5.2		20	75	72	67	50	50	83.3333	35	28.0875	50.1783	40.9412	0
	84	68	2	22.5	21	12	190	19.8	1	5	0	1		6.51724	6.66667	6.4	6.4	7	6.375	6.6		100	100	100	92	93.75	100	100	95	58.1729	66.3066	48.6446	0
	85	67	2	22.2	28	13	394	6	1	7.5	1	0		5.44828	5.33333	6.2	4.8	5.66667	5.75	4.8		75	62.5	84	52	62.5	100	41.6667	85	38.2105	61.8554	37.1607	1
	86	72	2	20.2	19	10	227	26.3	0		0	0		5.51724	6	5	5.8	5.66667	5.5	5.4		95	100	100	62	62.5	100	100	85	52.9392	51.7761	57.336	0
	87	47	1	23.3	23	20	180	24.8	1	5	0	0		3.24138	4.33333	3.2	2.8	3.66667	3	3.2		95	100	32	35	12.5	62.5	100	40	52.4276	18.4579	61.3078	0
	88	69	2	28.5	24	20	153	17.6	1	5	0	0		6.68966	5.33333	6.4	7	7	6.875	7		95	100	100	100	100	100	100	100	56.1382	71.1789	47.1933	0
	89	63	2	35.5	34	32	190	18.1	1	5	0	0		5.75	6.33333	5.6	6	6	5.57143	5.4		50	87.5	62	52	75	100	100	75	22.3429	56.5337	63.4126	0
	90	80	2	29.8	20	12	12.3	12.3	1	5	0	0		3.37931	5	2.8	3.2	3.33333	2.75	4.2		40	56.25	62	25	37.5	75	50	60	20.23	48.1542	43.7504	0
	91	62	2	23.3	27	21	205	15.9	1	7.5	0	0		5.06897	5.33333	4.8	5.2	6	5.125	4.4		100	87.5	41	40	50	100	75	70	44.7523	40.3905	57.1983	0
	92	76	2	30	63	40	454	15.1	1	7.5	1	0		4.62069	6	3.6	4.4	4	5.5	4		93.75	50	41	25	12.5	100	33.3333	30	45.9939	28.7679	40.6749	1
	93	78	2	23	30	16	159	11.5	1	10	1	0		4.89655	6.66667	4.8	5.8	5.33333	4	4.2		45	56.25	70	47	18.75	75	83.3333	31.25	31.902	37.969	47.4444	1
	94	78	2	22.1	20	13	133	22.5	1	5	0	0		5.62069	6.66667	5	6.4	6.33333	4.75	5.8		70	50	100	62	62.5	100	50	75	40.0949	64.2175	33.1546	0
	95	61	2	21.1	21	29	304	21.6	1	17.5	0	0		3.72414	6.66667	2.6	4.2	3.66667	3.75	2.6		50	25	62	20	0	50	16.6667	70	26.6234	45.4791	23.7811	0
	96	75	2	25.2	18	11	279	22	1	7.5	0	0		6	6.66667	5.2	6.2	6	6	6.2		55	100	62	40	43.75	87.5	91.6667	70	28.7283	43.3817	64.4089	0
	97	38	1	25.5	19	23	229	32.4	1	15	0	0		5.51724	5.33333	5.2	6	5.66667	5.625	5.2		100	100	52	60	81.25	62.5	100	75	53.9297	48.316	50.6402	0
	98	65	2	21.1	12	20	203	23.6	1	12.5	0	0		4.89655	5.66667	5.6	5.2	6	4.375	3.6		80	93.75	72	45	56.25	75	83.3333	55	47.5975	41.7579	51.2394	0
	99	48	2	30.4	21	22	229	10.9	1	15	1	0		6.55172	6.66667	6.8	6.6	6.66667	6.125	6.8		75	87.5	100	67	81.25	100	83.3333	90	42.1231	64.4134	49.3561	1
	100	38	1	25.2	181	394	375	16.2	0		0	1		5.7931	7	6.4	6.8	7	5	4		100	100	100	92	81.25	100	100	80	61.3831	59.7369	48.6558	0
	101	62	2	28.2	17	8	345	24	1	5	0	0		6.37931	7	6.4	7	6.33333	5.875	6.2		90	100	100	72	68.75	100	100	70	54.8581	52.225	54.3316	0
	102	56	2	24.5	23	14	208	18.2	1	5	0	0		5.7931	6.33333	5.6	7	5.33333	5.25	5.6		90	100	100	42	68.75	100	91.6667	70	49.5379	47.4497	58.459	0
	103	45	2	27.1	18	23	163	25.1	1	10	0			6.34483	6.66667	6.2	6.4	6.66667	6.25	6.2		90	100	100	62	81.25	100	100	70	52.3461	53.3977	55.7117	0
	104	53	2	18.3	35	19	206	19.5	1	2	1	1		3.96552	5.33333	3.8	5	5	2.875	3.4		60	56.25	70	30	18.75	62.5	50	30	40.484	34.543	36.4046	1
	105	74	2	20.8	37	36	271	15.4	1	7.5	0			3.26923	5.66667	3	4.8	2.5	3	1.75		65	43.75	31	20	25	50	25	45	33.8201	37.8505	28.8799	0
	106	59	2						0		0			4.72414	4.66667	4.4	4	5.66667	4.75	5.2		75	50	42	30	68.75	87.5	50	90	25.6362	58.5459	42.6744
	107	82	2	18.9	33	25	52	22.6	1	5	0			6.17241	7	5.8	6.4	6.33333	6.125	5.8		45	0	41	45	31.25	100	0	75	13.6612	64.6677	21.1514
	108	53	2	25.6	23	27	223	28.5	1	5	0	0		5.88235	6	5.5	5.33333	7	5.66667	6.33333		55	50	50	72	50	37.5	50	50	41.2981	53.845	20.7987
	109	67	2	20.8	18	11	78	14.2	1	6	1	1		5.37931	5.66667	5.6	6	6.33333	4.625	5		80	100	84	37	62.5	100	83.3333	70	41.8527	46.1365	59.9494	1
	110	64	2	31.6	22	21	119	15.7	1	8	0	1		6.62069	7	6.2	6.6	6.66667	7	6.2		100	100	100	52	87.5	100	100	90	51.448	56.3869	57.6795	0
	111	50	2		39	33	265	7.7	0		0			5.03448	3	5	5.4	5.33333	5.75	4.6		95	62.5	62	47	56.25	100	58.3333	80	43.3457	52.5713	43.7533
	112	45	2		18	12	273	30	1	5	0	0		3.13793	5	4	4.4	3.66667	2	1.4		60	37.5	22	45	25	37.5	75	15	37.8191	31.9199	33.7351	0
	113	63	2	16.4	36	31	345	31	1	4	0	1		6.51724	7	6.2	5.8	6.66667	6.875	6.6		100	87.5	32	67	68.75	.	100	75	.	.	.	0
	114	67	2	21.1	19	13	228	8.3	1	9	1	1		5.10345	6.33333	4.6	5.4	5.33333	4.625	5.2		45	37.5	100	42	62.5	50	50	75	30.3414	64.3735	24.5773	1
	115	75	2	19.2	31	22	181	15.8	1	1	0	1		4.41379	5	4	5.2	5	4.25	3.6		20	12.5	41	0	25	87.5	0	55	-0.173073	51.7063	32.3326	0
	116	73	2	21.9	32	23	339	23.4	1	3	0	1		4.68966	5.66667	4.8	5.2	6.33333	3	5.2		80	37.5	74	40	37.5	50	25	45	50.9854	45.9475	16.654	0
	117	69	2	21.8	17	10	108	12.9	1	4.5	0	1		5.10345	6	5.4	5.4	4.66667	4.375	5.4		85	75	72	42	50	100	75	75	40.575	48.0029	52.7441	0
	118	39	2		56	64	181	31	0		0			5.65517	7	4.8	7	7	4.25	5.8		100	100	100	97	62.5	100	100	60	66.7393	51.3846	47.6999
	119	60	2						0		0			5.51852	5	5.6	5.25	6	5.75	5.2		95	93.75	74	57	75	100	100	75	48.1282	50.6658	58.2371
	120	83	2						1	0.5	0	1		3.64286	6	2.6	3.4	3.66667	3.75	3.8		25	6.25	22	25	25	75	25	45	5.28734	50.377	30.705
	121	75	2	26.7	16	11	276	20.6	0		0	1		3.86207	5	2.2	3.8	4.33333	4.25	4		50	43.75	41	45	37.5	37.5	33.3333	50	33.0146	48.3365	22.5655
	122	58	2		18	10	110		0		0			5.7931	6.33333	5.2	6.6	6.66667	5	6		100	100	84	52	37.5	100	91.6667	85	52.434	42.8702	59.7886
	123	64	2	22.4	17	17	162	14.8	1	2.5	0	1		5.89655	6.33333	5.6	6.2	6.33333	5.375	6.2		85	.	.	.	.	.	.	.	.	.	.	0
	124	41	2	20.5	17	11	204	18.3	1	7.5	0	1		6.2069	7	5.4	6.6	6.66667	6	6.2		100	100	100	67	62.5	100	100	80	57.2662	50.7449	55.4765	0
	125	43	2	19.6	23	15	141	18.3	0		0	0		5.96552	5.33333	5.6	6.6	7	6.125	5.2		100	87.5	84	67	68.75	50	83.3333	85	61.0789	53.7615	36.4294
	126	68	2	24.4	25	21	202	14.3	1	4	0	1		4.82759	6	3.6	4.6	5	5	5.2		70	62.5	52	45	66.6667	37.5	33.3333	65	42.9412	53.9278	22.5035
	127	69	1	23	23	15	172	20.2	1	1	0	1		5.62069	6	5.8	5.6	5.66667	5.625	5.2		90	93.75	100	37	87.5	100	100	80	44.6269	53.6654	60.059	0
	128	56	2	21.8	34	39	374	1.3	0		0			3.62069	4.66667	1.8	5.4	3.66667	3.125	3.8		45	6.25	62	10	0	0	66.6667	85	21.6753	45.085	25.83	1
	129	63	2	19.1	26	18	147	19.6	1	5	0	1		4.96552	5	5.4	5.6	5	4.25	5		85	93.75	84	52	68.75	87.5	100	70	47.0447	48.7735	56.2887	0
	130	83	2	27.1	28	16	163	13.9	1	5	0	1		5.06897	5.33333	4.4	4.8	4.66667	6.25	4.2		30	62.5	62	45	56.25	100	91.6667	90	6.92842	61.6121	61.0381
	131	55	2	22	14	8	176	27.5	1	5	0	1		6.17241	5.66667	5.6	6.6	6	6.125	6.8		95	100	100	62	75	100	100	90	51.5086	55.9532	56.7705
	132	74	2	24.7					0		0	1		3.35714	6	1.2	3	4	4.125	3.2		44.4444	37.5	52	5	25	100	41.6667	30	17.0899	37.3005	47.7086
	133	88	2	18.1	34	16	265	16.7	0		0	1		6.34483	6.66667	5.6	6	6.66667	6.375	7		90	100	100	82	87.5	100	100	75	55.1284	59.7009	51.1221	0
	134	68	2	25.4	43	45	191		1	2.5	0	1		5.89655	4.66667	5.4	6.2	6.33333	6.125	6.2		95	100	100	62	81.25	100	100	85	52.128	56.2474	56.0721
	135	64	2	18.9	23	13	224	23.5	0		0	1		6.03448	5.66667	4.6	6.2	7	6	7		100	87.5	72	67	43.75	100	83.3333	70	54.9063	45.1598	51.1438	0
	136	69	2						0		0			5.72414	7	6	6.6	6.33333	5.125	4.4		80	50	100	52	37.5	50	50	30	60.0451	42.4697	20.933
	137	48	2						0		0			4.65517	4.33333	3.6	4.4	4.66667	4.875	5.8		70	43.75	74	10	12.5	75	33.3333	45	37.4335	35.3509	36.179
	138	70	2	19.5	18	9	119	21.4	1	1.25	0			5.06897	7	5.4	7	5	3.25	4.6		65	0	100	20	12.5	37.5	0	20	48.8593	41.2515	1.43409	0
	139	57	2	24.9	30	28	135	23.2	1	5	0	0		5.17241	6	4.2	5.6	5.33333	5.5	4.6		75	56.25	74	30	25	75	83.3333	70	36.7582	41.4837	49.7342	0
	140	58	2	21.3	28	31	158	19.2	1	5	0	1		4.48276	5.66667	4.4	5.6	6.33333	3.375	3.4		100	93.75	100	62	62.5	100	75	55	61.7694	46.713	46.2379	0
	141	78	2	26.8	19	13	175	12	1	7.5	0	1		3.55172	6	3	4.2	4.33333	2.875	2.6		40	31.25	22	20	12.5	25	33.3333	25	26.055	33.4859	25.354	0
	142	48	1	21.7	25	20	207	8.6	1	5	0	1		6.31034	7	5.8	6.4	6.66667	6.125	6.4		95	100	84	45	62.5	87.5	91.6667	70	52.1727	44.2832	56.1255	0
	143	68	2	24.1	46	34	424	18.6	1	2	0	1		4.17241	6	4.4	4.8	5	3.125	3.4		45	50	22	35	43.75	50	50	45	23.6238	44.5485	36.0057	0
	144	59	2						0		0			5.17241	5.33333	4.8	5	5.66667	5.25	5.2		85	93.75	74	57	62.5	87.5	75	70	48.4186	49.4815	48.9494
	145	64	1						0		0			3.58621	6	2.4	4	4	2.75	4		75	43.75	41	30	18.75	25	25	35	48.3714	34.0848	18.2629
	146	65	2	18.8	16	7	224	19.5	1	3	0	1		6.58621	5.33333	6.4	6.6	6.33333	7	7		95	100	100	80	75	100	100	95	54.167	60.4043	53.0468	0
	147	70	2	28.9	22	19	188	19.8	1	6	0	1		4.82759	6	3.4	5	5.66667	4.25	5.8		75	56.25	62	55	50	37.5	58.3333	70	46.3363	51.8297	26.5175
	148	35	2	18.9	24	29	176	25.2	1	11	0	1		6.75862	6.33333	6.2	7	7	7	6.8		100	100	12	75	68.75	0	100	90	58.017	46.8543	37.0043	0
	149	69	2	22.3	25	25	284	22.7	1	5	0	1		5.68966	6	5.8	5.4	6	5.625	5.6		95	93.75	100	52	75	100	91.6667	90	49.3899	55.6997	55.1102
	150	55	2	21.9	20	24	261	27.4	1	5	1	0		7	7	7	7	7	7	7		100	100	100	97	100	100	100	100	57.9983	69.8974	47.3891	1
	151	36	2	21.5	22	25	337	38.5	0		0	0		4.2069	7	3.8	4.6	5.33333	4	2.2		95	43.75	64	72	37.5	25	25	25	71.2495	42.3059	2.98816
	152	76	2	20.2	44	47	284	8.7	1	5	1			4.13793	4	3.8	4.2	4	3.625	5.4		40	6.25	41	25	37.5	25	25	30	25.8582	47.0609	13.0766	1
	153	73	2	17.5	24	18	154	19.6	1	5	0	0		5.10345	5	4.6	4.8	5.33333	4.875	6.2		85	68.75	74	31.25	43.75	50	50	50	52.4761	39.8382	32.3171	0
	154	43	2	19.4	22	19	262	31.9	1	5	0	0		4.03448	4.66667	2.8	4.8	5	3.75	4		85	75	62	42	25	50	50	35	56.8215	32.0321	32.8698	0
	155	69	2	19.8	136	132		12.4	1	12	1	1		2.75862	4.33333	2.4	3	2.66667	2.625	2.2		50	62.5	41	10	12.5	12.5	25	25	38.4266	27.1312	25.7841	1
	156	80	1	22.4	18	13	260	19.4	1	2.5	0	0		6.44828	7	6.2	6.4	7	6.125	6.6		95	100	100	82	68.75	100	100	70	59.2809	53.2943	51.6379	0
	157	60	1		18	8	145	21.7	1	5	0	1		5.82759	6.33333	5.2	5.8	6	5.875	6		95	62.5	100	57	50	100	75	75	51.6088	52.8785	43.06
	158	66	2	20.5	15	8	108	18.4	1	5	1	1		5.37931	5.66667	5.4	5.2	5.66667	5.375	5.2		90	100	84	52	62.5	100	100	85	45.856	49.6608	61.586	1
	159	54	2		20	15	227	23.3	0		0			5.93103	5.66667	4.8	6.6	6.33333	5.75	6.6		100	75	72	35	43.75	62.5	75	75	52.7662	41.7296	43.7883
	160	65	2	25.9	32	19	200	6.8	1	8	1	1		3.96552	4	4.2	4	4.33333	4.125	3.2		65	75	62	25	43.75	75	75	50	34.4389	38.8929	52.0685	1
	161	21	1	18.3	24	29	162	39.4	1	6	0	1		4.75862	7	4	5.4	7	3.75	3.8		95	100	100	22	43.75	100	91.6667	50	52.6877	32.3473	63.0101	0
	162	16	2	20.7	15	10	267	36	1	5	0	1		4.58621	4.66667	3.4	4.8	4.66667	4.375	5.8		100	43.75	22	47	56.25	50	41.6667	65	48.7079	47.9096	24.5401	0
	163	12	2	19.6	21	1		23.9	1	5	0	0		6.93103	7	6.6	7	7	7	7		100	100	100	95	93.75	100	100	85	60.5439	64.4566	47.4235	0
	164	16	2	22.1	18	11	375	32.2	1	5	0	1		6.10345	7	5.8	6.8	6.33333	5.625	5.8		95	100	100	72	62.5	100	100	65	58.4698	48.7993	54.0048	0
	165	19	2	22.9	33	29	164	38.7	1	5	0	1		6.10345	6.66667	5.2	6.8	6.66667	5.375	6.8		80	50	100	77	56.25	87.5	83.3333	70	48.7229	59.7343	36.012	0
	166	5	1	16.5	27	14	11	16.5	1	4	0	0		6.86207	6.66667	6.6	7	7	6.875	7		95	100	100	92	100	100	100	100	54.5612	69.7323	48.9714	0
	167	17	2	18.4	30	58	323	22.5	1	5	0	0		3	1.33333	2.4	5	3.5	2	4.2		95	100	51	42	50	75	50	40	56.9237	34.2383	43.3053	0
	168	76	2	22.2	17	7	220	15.6	1	5	0	0		5.34483	6.66667	3.4	7	6	5.375	4.4		85	50	100	57	50	50	91.6667	55	55.5245	48.3501	32.5969	0
	169	84	2	14.7	26	9	141	14.3	1	2	0	0		6.06897	6.66667	6.2	6.2	5	6	6.2		60	100	100	52	68.75	100	91.6667	85	34.1308	57.2809	59.8939
	170	67	2	23.2	13	9	140	20.9	0		0	1		6.48148	6.66667	6	6.4	7	6.625	6.25		95	100	100	52	100	100	100	100	46.6761	62.4993	57.8622	0
	171	66	2	19.9	19	15	185	14.5	1	6	1	0		6.2069	7	5.8	7	6.33333	6.125	5.4		85	87.5	100	67	.	100	100	.	.	.	.	1
	172	70	2	20.1	20	6	243	21	1	1.5	0	1		5.37931	6.33333	5.8	5.4	5.66667	5.375	4.2		80	75	52	42	75	100	75	70	34.6062	52.2	53.1981	0
	173	63	2	27.3	22	11	205	24.8	1	5	0	1		5.37931	6	5.2	5.6	5.66667	5.375	4.8		70	81.25	84	52	62.5	100	75	70	38.2773	53.6922	50.9899	0
	174	59	2	23.5					1	10	0	1		6.34483	7	5.8	6.4	6.66667	6.5	6		95	100	52	42	81.25	100	100	100	37.5345	53.0814	66.0176	0
	175	36	1	23.8	19	25	280	21.8	1	5	0	1		5.37931	6	5.4	4.6	6	5.5	5.2		95	100	100	40	50	100	100	65	52.7026	40.032	61.96	0
	176	74	2	17.3	14	9	163	15.7	0		0	1		5.55172	6	5.8	4.4	5.33333	5.625	6.2		55	50	72	47	56.25	100	58.3333	50	29.2538	53.7705	42.2015	0
	177	47	2	21.4	17	9	223	21.2	1	2	0	1		6.51724	7	6.6	6.8	7	6	6.4		90	100	100	62	81.25	100	91.6667	75	52.0498	55.2433	53.4482	0
	178	90	1	20	28	16	305	17.6	1	4	0	1		5.93103	6.33333	5.6	5.8	5.66667	6.125	6		50	50	74	67	68.75	75	58.3333	80	29.1618	67.5486	32.5062	0
	179	57	2	24.2	17	11		17.5	1	5	1	0		4.92857	7	5.6	4.75	5.33333	4	4.4		85	100	100	57	87.5	100	100	75	47.7487	55.9193	57.1499	1
	180	66	2	23.9	17	9	200	26.5	1	3	0	1		5.48276	5.66667	5.6	5.2	6	5.125	5.8		80	100	74	72	62.5	100	100	90	42.3429	55.2978	59.3325	0
	181	63	2	19.5	28	17		17.6	1	2	0	1		5.58621	6	5.4	6	5.66667	5.375	5.4		90	68.75	70	72	87.5	87.5	66.6667	75	48.82	62.622	36.2154	0
	182	60	2	25.6					1	6	0	1		6.31034	7	5.2	7	6.66667	6.125	6.4		90	100	100	67	75	100	100	90	50.0428	57.5964	56.1302	0
	183	68	2	21.9	64	36	253	9	0		0	1		4.44828	6.66667	3.6	4.6	5.33333	2.625	6.2		90	81.25	100	45	43.75	75	75	35	60.368	36.8046	42.0827	0
	184	70	2	19.6	19	7	145	17.6	1	10	0	0		4	6.66667	2.8	4.2	4.66667	4	3		0	0	32	10	12.5	12.5	0	35	5.00645	47.327	10.8791	0
	185	39	2	18.3	16	10	136	21.5	1	15	0	1		5.96552	6.66667	6.2	6.4	5.66667	6.125	4.8		40	93.75	74	37	75	87.5	100	75	19.2015	54.7453	64.6905	0
	186	80	1	22.8	29	14	130	16.6	0		0	1		4.17241	6	3.6	4.4	3.66667	3.875	4.2		70	56.25	74	25	43.75	62.5	58.3333	60	38.0523	44.9122	38.703	0
	187	60	2	27	21	18	245	17.9	0		0	1		6.06897	7	5.6	5.6	6.33333	6.625	5.4		95	100	84	67	81.25	100	100	85	50.4532	56.1055	56.517	0
	188	41	2	20.3	18	17	265	28.4	1	2.5	0	0		5.86207	6	6	6.2	6.33333	5.875	5		95	100	100	43.75	81.25	87.5	100	80	51.4024	51.3178	56.678	0
	189	76	1	20.1	36	31	520	23.8	0		0	0		6.72414	7	6.8	7	6.66667	6.875	6		100	100	100	82	100	100	100	95	55.9312	65.9888	50.446	0
	190	60	2	21.9	22	32	257	35	1	6	0	1		6.31034	6	6.2	6.2	5.66667	6.75	6.4		80	75	42	67	62.5	75	83.3333	80	40.0033	53.9623	46.205	0
	191	55	2	25.6	31	38	182	11.8	1	15	0	1		3.41379	5.33333	3.4	3.8	4	2.75	2.6		70	43.75	74	25	43.75	25	25	30	50.2298	40.8428	14.6731	0
	192	66	2	20.9	13	6	206	20.5	0		0	1		5.82759	6.33333	5.6	5.4	5.66667	5.875	6.2		25	0	.	45	.	.	0	.	.	.	.	0
	193	69	2	18.5	13	6	206	20.5	1	2	0	1		5.62069	6.33333	5.8	5.6	6	5.375	5.2		100	100	100	62	91.6667	100	100	68.75	57.0208	54.1047	53.9981	0
	194	44	2	33.8	25	27	262	25.9	1	7	0	0		5.51724	6	5.4	4.8	6	5.25	6.2		85	75	100	52	68.75	100	75	75	46.391	56.1132	46.534	0
	195	81	2	30	23	16	200	19.9	1	5	0	0		5.17241	6.33333	5.2	5.2	6.66667	4.875	4		50	100	80	52	56.25	75	100	80	30.7035	51.7581	59.5409	0
	196	45	2	25.3	19	20	175	20.9	0		0	0		6.2069	5.66667	6.4	6.2	6.66667	6.375	5.8		95	100	100	52	75	87.5	100	90	51.5194	53.7116	55.8199	0
	197	61	2	22.1	15	11	155	21.4	0		0	1		4.86207	5.66667	4.8	4.2	4.66667	5.125	4.8		70	100	62	35	50	37.5	83.3333	65	44.2384	39.4706	48.1748	0
	198	42	2	19.1	12	3		13.6	0		0	0		5.68966	6	5.6	6.2	6	5.125	5.8		95	100	100	52	62.5	100	100	65	54.5273	45.1828	58.4502	0
	199	62	2	28.4	22	23	160	26.7	1	2.5	0	0		4.44828	5.33333	4.4	4.4	5.66667	4	4		90	93.75	62	5	56.25	75	100	80	37.3163	37.0755	66.6277	0
	200	74	2	20.4	23	18	185	16.4	1	6	0	1		4.51724	6	5	5.2	5.66667	3.375	3.6		55	0	54	22	18.75	25	0	30	36.6337	43.5334	3.36553
	201	72	1	22.8	23	14	216	20.1	1	5	0	1		6.14286	6.33333	6.2	5.4	6.5	6.625	5.8		90	93.75	84	77	93.75	100	100	100	46.0217	66.1278	53.4118	0
	202	65	2	23.6	24	26	150	23.2	1	7.5	0	0		5.89655	6.33333	6.8	7	5	5.75	4.4		100	100	100	55	87.5	100	83.3333	70	56.7858	53.4431	50.8229	0
	203	38	2	17.2	17	13	289	20.2	0		0	1		4.58621	5.33333	3.8	3.6	5.66667	4.125	6		85	56.25	72	57	56.25	100	33.3333	65	45.786	55.7761	31.7044	0
	204	57	2	21	20	9	249	26.3	0		0	0		6	6.33333	6	5.8	6.66667	5.625	6.2		95	100	100	72	68.75	100	100	80	55.5299	53.8785	54.4149	0
	205	78	1	24.9	41	29	256	10	0		0	0		5.34483	6	5.2	4	5.33333	5.625	6		90	75	64	.	62.5	50	66.6667	50	.	.	.	0
	206	80	2	18.9	39	36	182	17.3	1	5	0	0		5.10345	6	3.8	4.6	5.33333	5.625	5.4		40	87.5	31	45	50	62.5	83.3333	70	20.0101	47.5599	55.7327	0
	207	68	2	19.6	23	13	166	15	1	5	0	0		6.37931	6.33333	6.6	6.2	6.66667	6.25	6.4		95	100	100	87	75	87.5	100	80	60.1985	57.648	47.4862	0
	208	69	2	21.6	35	25	259	4.4	0		0	0		6.41379	6.33333	6.2	6.4	7	6.375	6.4		90	100	84	50	75	100	100	90	44.0311	53.4763	61.465
	209	52	2	20.8	16	16	189	25.6	1	7	0	0		6.24138	7	5.2	7	6.66667	6.25	5.8		95	100	100	52	81.25	100	100	80	51.0466	53.2429	58.0176	0
	210	79	2	26.9	24	21	328	12.8	1	30	1	1		3.37931	4	2.4	3.6	1.33333	4.75	2.8		25	25	22	10	12.5	100	25	70	-3.31917	48.8158	46.6409	1
	211	70	2	22.7	46	61	142	24	0		0	1		5.82759	7	6	6.8	4.66667	5.75	4.8		100	100	100	45	56.25	75	50	60	64.2846	43.5209	38.0887	0
	212	56	2	17.5	21	10	148	16.6	1	7.5	0	1		5.37931	6.33333	5.4	7	6.66667	5.375	2.4		95	87.5	100	57	50	100	66.6667	45	60.5053	42.7291	44.2257	0
	213	77	2	19.2	20	12	207	15.1	1	5	0	1		6	7	6.6	5.8	5.66667	5.875	5.4		35	68.75	84	50	68.75	100	83.3333	85	15.7073	64.7443	54.9978	0
	214	74	1	26.3	24	16	174	10.2	0		0	0		5.68966	7	4.6	5.2	6.66667	5.875	5.6		95	100	.	50	.	.	100	.	.	.	.	0
	215	74	2	17.5	36	22	186	19.8	1	5	0	0		2.86207	2.33333	2.8	5	3.66667	1.75	2.4		80	50	41	20	6.25	62.5	50	40	41.5166	28.1994	39.6185	0
	216	62	2	36	13	5	326	28.1	0		0	1		3	4	2.8	3.8	3	2.5	2.6		20	25	21	35	31.25	25	8.33333	50	14.819	52.3951	15.1588	0
	217	80	2	31.1	34	29	379	11.2	0		1	1		6.24138	7	6	6.2	5.66667	6.625	5.8		55	75	.	40	.	.	75	.	.	.	.	1
	218	69	2	26.2	24	20	296	18.3	0		0	1		4.58621	4	4.2	4.8	4.33333	4.5	5.4		95	68.75	74	52	62.5	75	66.6667	55	54.6171	47.3478	37.2041	0
	219	71	2	24.9	23	14	231	14.3	1	6	0	1		6.03448	6.66667	5	5.2	6.66667	6.25	6.8		80	100	84	67	56.25	100	100	75	45.96	49.9682	59.0611	0
	220	76	2	20.7	21	12	184	11.8	1	5	0	1		4.96552	6.66667	5.8	4.4	6.33333	4.25	4		90	93.75	100	57	87.5	100	100	75	49.4592	56.0856	55.3365	0
	221	60	2	22.8	23	17	330	19.1	0		0	1		6.03448	5.66667	5.4	6	6	6.375	6.4		85	100	84	42	75	100	100	90	40.0026	52.7687	63.7142	0
	222	67	2	23.9	30	24	297	19	0		0	1		6.10345	6.66667	5.6	6.2	6.66667	5.75	6.4		90	100	62	67	81.25	100	100	90	43.4537	56.6024	59.405	0
	223	66	2	20	27	19	527	20.5	0		0	0		5.48276	5.66667	4.6	5.6	6	5.375	6		75	62.5	62	50	68.75	87.5	75	75	35.2752	56.1225	45.7588	0
	224	45	2	27.8	16	18	228	28.2	1	10	0	0		2.17241	6	1.8	2.8	1	1.75	1		95	100	100	57	37.5	100	100	5	67.2725	25.77	55.6985	0
	225	63	2	24.9	26	16	178	17	0		0	0		6.17241	6	6.4	6	7	5.875	6.2		95	100	100	62	87.5	100	100	85	51.8577	57.7379	55.6507	0
	226	73	1	21	41	18	112	19.2	1	2.5	0	1		5.82759	7	5	4.6	6.33333	6.125	6.4		85	93.75	100	77	62.5	100	100	60	54.7014	50.8906	52.2161	0
	227	82	1	24.9	51	37	336	18	0		0	1		5.48276	6.33333	5.8	4.4	5.33333	6	5		70	100	100	72	87.5	50	100	100	46.8304	65.0967	43.9214	0
	228	53	2	18.7	22	12	257	13.8	1	7.5	1	0		6.37931	7	6	6	6.33333	6.5	6.6		85	100	61	77	87.5	100	100	90	42.5368	60.5748	57.3293	1
	229	47	1	27.3	41	36	210	10.8	1	5	0	1		4.65517	7	5.2	6	5.33333	4.25	1.6		70	62.5	100	40	62.5	100	91.6667	50	38.7216	49.2006	52.0467	0
	230	73	2	27	34	54	249	18.1	1	5	0	0		5.65517	6.33333	6.2	6.2	6.33333	6.125	3		75	100	100	77	100	100	100	100	41.7984	69.9761	54.1896	0
	231	69	1	20.1	29	20	246	8.2	1	7.5	0	1		4.24138	4.33333	4	3.8	2.33333	4.875	5		20	0	31	35	37.5	37.5	0	60	10.0793	61.6359	9.58257
	232	76	2	24.7	97	67	496	13.7	0		1	1		6.86207	7	7	7	7	7	6.2		85	100	100	57	100	100	100	100	42.7588	64.8815	57.6929	1
	233	77	2	16.4	25	13	259	17.3	1	5	0	1		6.10345	6.66667	5.6	6	6	5.875	6.8		75	93.75	.	52	.	.	91.6667	.	.	.	.	0
	234	62	2	30.2	21	14	152	28.3	0		0	1		5.82143	7	5.6	5.6	6	5.75	5.6		65	81.25	100	52	66.6667	100	91.6667	70	37.119	55.1722	54.705	0
	235	65	2	19.7	46	38	384	13.1	0		0	1		4.51724	3.66667	5	4.2	5.66667	4.5	4.2		85	87.5	84	40	81.25	100	91.6667	75	41.1191	52.7688	57.6808	0
	236	69	2	26.2	20	18	264	19	0		0	1		5.96552	6.66667	5	5.6	6.33333	6.25	6.2		95	100	100	62	68.75	100	100	95	50.8892	55.659	57.469	0
	237	63	1	23.9	25	23	198	16.1	1	12.5	0	1		6.68966	7	6.4	6.6	7	7	6.2		100	100	100	77	81.25	100	100	90	56.6466	59.417	52.5441	0
	238	82	2	19.8	32	17	474	37	0	0	0	1		5.48276	6	4.8	5	5.66667	6.125	5.2		80	62.5	41	55	62.5	100	66.6667	80	33.2124	55.7031	47.5502	0
	239	55	1	24.3	33	28	250	22.4	0	0	0	1		6.65517	7	5.8	6.8	7	6.625	7		95	100	100	82	75	100	100	85	56.341	58.3735	52.048	0
	240	56	1	21.9	26	26		12.4	1	3	0	0		6.06897	6.33333	5	6.6	7	5.5	6.8		95	100	100	50	31.25	100	100	45	59.0443	32.5838	59.8928	0
	241	73	2	31.6	15	10	131	14.9	0		0	0		5.72414	6.66667	4.8	4.8	6.33333	5.75	6.6		100	93.75	100	92	75	100	100	95	58.243	62.7405	48.5663	0
	242	53	2	28.7	38	42	262	18.3	1	5	0	1		4.51724	5	5	4.4	5	4.375	3.8		85	100	62	47	62.5	62.5	83.3333	65	49.4534	43.271	49.5985	0
	243	74	2	21.9	26	21	650	20.6	0		0	1		4.58621	4.66667	3.2	4.6	4.33333	4.875	5.6		75	31.25	100	65	62.5	100	75	85	37.3545	67.1813	36.1661	0
	244	65	2	21.7	18	13	186	17.3	1	5	0	0		5.68966	5.33333	5.6	5.2	6	6	5.8		90	87.5	100	82	75	100	83.3333	85	53.5946	62.2219	44.7531	0
	245	67	2	24.7	26	34	123	18	1	15	0	1		5.13793	6	4.6	6	4.33333	4.625	5.6		65	56.25	80	52	56.25	62.5	58.3333	70	39.6005	56.2993	32.3008	0
	246	69	2	23.7	28	13	978	14	0		1	1		3.10345	4	3.2	2.4	4.33333	3.25	2.2		25	12.5	51	45	18.75	50	25	35	20.8073	50.2346	18.3017	1
	247	59	1	24.3	30	23	360	10.5	1	10	1	1		5.47059	6.5	5.75	5	6.5	5	4.66667		95	100	100	52	75	100	100	81.25	51.0945	52.0515	58.5082	1
	248	65	2	22.2	16	35	168	9	1	30	0	0		3.86207	5.66667	3	4.8	4.66667	3.625	2.6		60	43.75	80	65	31.25	37.5	0	60	49.21	56.5243	4.19762	0
	249	60	2	22.9	21	25	189	19.8	1	25	0	1		5.58621	6.66667	4.6	6	6.66667	5.25	5.4		95	75	74	50	68.75	50	75	85	52.725	53.2328	36.4264	0
	250	71	2	22.7	24	18	229	18.3	0		0	0		6.68966	7	6.6	6.8	7	6.75	6.2		100	100	100	67	100	100	100	100	52.0845	64.4727	54.0571	0
	251	79	2	22.2	21	27	215	13.7	1	7.5	0	0		5.82759	6.66667	6.2	5.8	5.33333	5.75	5.4		50	12.5	.	57	50	.	41.6667	87.5	.	.	.	0
	252	71	2	23	32	27	251	13.3	0	0	0	0		6.03448	7	4.4	6.4	6	6.375	6.2		85	75	100	67	81.25	100	75	90	46.1376	65.3953	43.1888	0
	253	55	2	23.8	45	35	255	29.2	1	10	0	1		4.7931	4	4.2	6.4	6	4	4.8		90	25	84	35	31.25	75	50	30	52.2786	39.869	26.7245	0
	254	65	2	17.1	17	11	182	19.7	0		0	0		5.17241	4.33333	5.4	5	5.33333	5.125	5.6		95	91.6667	100	62	62.5	100	91.6667	75	54.3245	51.24	52.4514	0
	255	79	1	23.3	48	41	610	10.8	1	7.5	0	1		5.85714	6	6	5.2	5.5	5.875	6.4		50	62.5	62	65	81.25	75	66.6667	90	25.3401	69.3158	39.0548	0
	256	55	2	23.5	21	14	229	13.8	1	5	0	0		5.10345	5	4.6	6.2	4.33333	5	5.2		90	81.25	100	52	56.25	87.5	100	70	51.2155	47.9102	52.4194	0
	257	65	2	20.7	20	11	156	18.9	1	5	0	0		6.37931	6.33333	6.4	6.8	6.66667	6	6.4		100	100	100	72	87.5	50	100	90	63.3189	58.27	40.5409	0
	258	40	2	23.3	21	22	193	26.5	0		0	0		6.68966	7	6	6.8	7	6.625	7		95	100	84	52	62.5	100	100	90	47.4176	50.118	61.3921	0
	259	78	2	20.7	24	18	172	11.5	1	3	0	0		6.72414	7	6.4	6.6	7	6.625	7		95	100	100	97	100	100	100	100	55.5468	70.6365	47.8601	0
	260	78	2	20	16	10	164	16.2	1	15	0			4.93103	6.33333	4.4	4.6	5.66667	4.625	5		65	25	52	45	43.75	50	75	65	32.0854	51.8201	32.3422	0
	261	32	2	16.5	19	15	399	31	0		0	0		6.13793	5.66667	6.4	6.6	7	6.125	5.2		95	100	100	47	68.75	75	100	65	57.2354	44.9024	52.7935	0
	262	47	2	23	19	14	160	26.7	1	12.5	0	1		5.44828	7	4.8	6.2	6.33333	4.625	5.2		90	75	100	52	31.25	75	75	45	59.768	38.3872	40.5815	0
	263	56	2	22.6	34	28	340	18.6	1	3	0	1		6.10345	6.33333	6.6	6	6.66667	5.75	5.8		100	100	100	62	81.25	100	100	90	53.6897	56.7047	55.8782	0
	264	74	2		47	33	243	21.3	1	5	0	1		6.27586	7	6.6	6.4	6.66667	6.125	5.4		95	100	100	57	87.5	100	83.3333	90	51.1693	59.3288	51.9579	0
	265	57	2	27	21	20	243	10	1	5	1	0		6	6	5.4	5.6	6.33333	6.25	6.4		90	100	84	62	50	100	100	90	47.4782	49.6843	60.4831	1
GROUP	patient No	age	sex 1:M 2:F	BMI	AST	ALT	ALP	PLT	Use of PSL	dosage of PSL	Cirroris	comorbidities	CLDQ	Overall	abdominal	fatigue	sysytemic	activity	emotions	worry	SF-36	PF	RP	BP	GH	VT	SF	RE	MH	PCS	MCS	RCS
healthy	1	55	2	24.8										6.31034	5.33333	6.2	6.4	7	5.98	7		95	93.75	62	72	62.5	100	75	75	51.4111	51.5608	49.2909
	2	59	2	22.3										6.17241	6.66667	5.8	6.4	6.66667	5.60695	6.6		100	87.5	100	57	68.75	100	100	85	52.6527	53.434	54.8704
	3	62	2	20.5										6.34483	6	5.4	6.6	6.33333	6.1485	7		95	93.75	100	87	62.5	87.5	100	90	58.2186	57.9649	47.5408
	4	68	2	21.3										6.03448	6	5.8	6.2	6.33333	5.81999	6.4		90	100	84	62	81.25	100	100	80	47.9059	54.7441	57.8222
	5	59	2	21.8										5.68966	6.33333	5	5.6	6.33333	5.46259	6.2		95	100	100	92	81.25	100	100	80	58.9317	60.4759	49.1269
	6	53	2	24.1										4.34483	4	2.8	5.6	4.66667	3.33646	6.8		80	62.5	42	45	31.25	37.5	25	35	53.6461	36.8218	20.7182
	7	56	1	24.2										6.65517	6.33333	6.2	6.6	7	6.37994	7		100	100	84	87	75	100	100	90	56.2277	58.6887	52.299
	8	51	2	23.1										6.34615	6.66667	6.2	6.4	6.33333	6.16334	7		100	100	100	87	100	100	100	95	56.9168	66.8929	49.3346
	9	52	2	27										6.27586	6.66667	5.8	6.4	6	6.02812	7		100	100	100	77	75	100	100	85	57.8068	56.7303	52.6883
	10	56	2	21										4.58621	6	4.2	5.2	5.66667	3.4195	5.2		90	100	100	62	43.75	62.5	66.6667	45	66.7381	39.7712	37.1714
	11	53	2	20.1										6.51724	6	6.4	6.4	6.66667	6.47006	7		95	100	72	77	81.25	100	100	85	50.4291	57.1292	55.4615
	12	56	2	20.3										6.41379	7	6	6	7	6.25307	6.8		100	100	100	97	81.25	100	100	90	60.5891	63.0335	48.0988
	13	63	2	23.3										5.96429	6.33333	5.6	6	6.33333	5.77547	6.2		85	100	52	72	68.75	.	100	85	.	.	.
	14	60	2	21.3										6.44828	7	6.2	6.4	7	6.23051	6.4		100	100	51	62	75	50	100	85	54.6305	49.0809	48.0952
	15	52	2	23.9										6.48276	7	6	6.2	7	6.27765	6.8		100	100	100	97	81.25	100	100	90	60.5891	63.0335	48.0988
	16	67	2	24.2										6.37931	7	6.2	6.6	7	6.20373	6		85	100	100	82	81.25	87.5	100	65	56.7091	56.1237	48.2869
	17	61	2	22.5										6.27586	5.66667	5.8	6.6	6.33333	6.07455	7		100	100	100	100	100	100	100	90	60.3693	68.0474	46.168
	18	66	2	24.1										5.7931	6	5.8	6	6	5.49885	6		90	100	72	62	68.75	100	100	70	48.231	48.5861	59.2778
	19	62	1	25.3										6.82759	7	6.4	7	7	6.83361	6.6		95	100	100	67	93.75	100	100	95	50.7932	62.525	54.6723
	20	59	2	23.9										6	6	6.2	6	6.66667	5.67097	6		95	100	72	57	81.25	100	100	90	45.5967	54.7089	60.184
	21	62	2	24.1										6.72414	6.66667	6.4	6.6	7	6.48966	7		100	100	100	77	87.5	100	100	95	55.4863	62.1037	52.3999
	22	65	2	21.2										5.86207	5.66667	6	5.4	6.33333	5.50252	6.6		100	100	100	52	87.5	100	100	75	54.1175	52.7981	56.8481
	23	74	2	20.1										6.24138	7	5.6	6.2	6.33333	6.0387	6.6		95	100	84	72	81.25	100	100	75	53.2185	54.6171	54.8514
	24	45	2	26.4										5.24138	5.33333	4.2	5.6	6.33333	4.40693	6.6		95	87.5	100	62	37.5	100	75	65	57.8788	44.788	47.6062
	25	62	2	17.2										5.58621	5	5.2	4.8	6.33333	5.52264	6.8		90	81.25	62	67	75	75	75	75	49.9154	55.3206	40.9995
	26	71	2	26										6.03448	6.33333	5.8	6.2	6.33333	5.34831	6.8		90	87.5	84	72	75	75	83.3333	85	52.927	58.5009	42.1855
	27	45	2	21										5.65517	5.66667	4.2	6.8	6.66667	4.6624	7		80	100	84	92	81.25	100	100	70	50.6964	59.2545	51.542
	28	47	2	22.1										5.89655	6	5.4	5.2	6.66667	5.70379	6.8		85	81.25	72	81.25	56.25	87.5	75	80	49.8751	56.4484	42.0449
	29	50	2	20.2										5.41379	5	4.2	5	7	5.13478	7		100	100	72	62	62.5	100	100	80	51.6246	48.0101	59.3113
	30	66	2	25.2										5.13793	5	4.6	5	6	4.96162	6		100	87.5	62	52	62.5	75	75	65	54.9229	44.8514	45.0221
	31	63	2	21.5										5.51724	7	5.2	5.6	5.66667	5.33413	5.2		75	75	62	52	62.5	75	75	75	39.4039	52.7497	45.2469
	32	65	2	21.5										6.24138	6	6	6	6	6.21305	6.8		95	93.75	100	92	81.25	87.5	100	90	58.3931	63.3404	45.1655
	33	64	2	21										6.82759	7	6.4	6.8	7	6.65454	7		95	100	100	77	100	100	100	100	51.6043	67.02	52.3055
	34	64	2											6.34483	6.66667	6.2	6.4	6.66667	6.00715	6.6		100	75	100	87	75	87.5	75	80	61.4667	62.4784	34.024
	35	58	1	24.5										5.03846	5	4.8	5.2	5	4.91744	5.66667		95	75	62	52	50	75	75	55	53.3099	42.0276	43.0969
	36	61	2	24.1										5.03448	5	5.4	5	5.33333	4.89085	4.8		65	75	74	45	50	75	75	50	40.1064	44.7844	46.0346
	37	62	1	21.4										6.28	6	6.2	6.6	6	6.06435	7		85	100	84	72	87.5	100	100	80	47.1553	58.7819	55.6492
	38	56	2	19.3										6.2069	7	6	6.2	7	5.25695	7		90	100	72	67	68.75	100	100	55	51.8861	45.9015	57.335
	39	60	1	23.7										5.18519	4.66667	4.8	4.8	5.5	5.01764	6.25		85	100	51	77	68.75	100	100	80	43.4648	53.0571	59.0117
	40	60	1	22.3										5.55172	5	5.2	5.2	6.33333	5.57915	6.2		80	81.25	84	62	62.5	100	83.3333	75	43.6681	54.5693	50.6429
	41	59	2	20.5										5.47619	6	5.6	5.6	6	5.31259			90	100	74	52	75	100	100	80	44.5422	50.7916	61.4389
	42	53	2	20										4.53571	4	5.4	6.4	4.33333	3.15878	5.25		90	87.5	100	72	56.25	50	66.6667	30	71.3382	42.3489	27.4167
	43	58	1	26.8										6.65517	7	6.4	6.8	7	6.21233	7		95	100	100	77	81.25	100	100	85	55.0849	58.9598	52.738
	44	75	1	23.8										6.875	7	7	6.4	7	6.81335			95	100	100	82	75	100	100	80	57.2308	57.1772	51.7709
	45	63	2											6.75	7	6.8	6.8	7	6.42901			85	100	84	68.75	68.75	100	100	85	46.436	54.9191	57.9127
	46	62	1	25.2										6.09091	6.66667	6.2	6.2	6.33333	5.91096			75	100	72	57	81.25	100	100	80	37.5705	55.2726	61.5139
	47	60	1	28.1										5.72	6.33333	5.6	6.2	6	5.32019	6		95	75	74	72	75	75	75	75	54.6069	57.1755	36.9076
	48	63	2	23.7										6.21429	6.33333	6.2	6	7	5.86106	6.5		95	100	100	87	87.5	100	100	90	55.896	63.4548	50.3712
	49	75	2											6.37931	7	5.8	6.2	6.33333	6.19868	7		95	87.5	100	92	87.5	100	83.3333	100	54.8071	69.8608	42.0482
	50	57	2	22.8										6.82759	7	6.2	6.8	7	6.88173	7		100	100	100	97	93.75	100	100	95	59.1585	67.2107	47.5333
	51	49	2	24.8										6.24138	5.66667	6.4	6.4	7	5.74953	6.8		95	100	72	62	56.25	100	100	80	49.4436	47.2587	60.2037
	52	46	2	22.6										6.13793	7	5.6	5.6	7	5.78811	6.4		95	75	42	55	6.25	37.5	75	35	61.974	24.7442	36.6962
	53	54	2	21.8										5.65517	5	5.2	4.4	6.33333	5.93561	7		90	100	42	62	43.75	100	100	75	43.4343	41.8592	64.1582
	54	62	2	19.5										6.77273	6.66667	6.4	6.6	7	6.74581			90	100	100	72	87.5	100	100	90	50.4876	61.4814	54.1762
	55	54	2	22.1										4.73077	4.33333	4.2	5.8	6	4.09296	5		100	100	72	92	43.75	100	100	60	61.909	44.1785	52.7987
	56	41	2	25.2										6.65517	6.66667	6.4	6.6	7	6.42052	7		95	100	100	87	75	100	100	90	56.4368	60.4739	51.2138
	57	53	2	19.5										5.96552	5.33333	5.2	6	7	5.71228	6.8		95	81.25	84	67	50	100	75	70	54.0323	49.7285	46.1433
	58	44	2	23.5										6.13793	6	5.8	6.6	6.33333	5.83666	6.4		90	75	100	62	43.75	75	100	65	55.8585	46.0133	46.2466
	59	50	2	20.7										6.27586	7	6	6	7	5.78469	6.6		100	100	100	62	81.25	87.5	100	80	57.4514	53.8788	52.1506
	60	51	2	24.6										5.68966	6.66667	5.2	6	6	5.41052	5.6		95	100	100	62	68.75	75	100	60	61.0822	46.4186	49.1824
	61	41	2	20										5.82759	6.66667	4.8	6.4	5.33333	5.52995	6.6		95	87.5	84	57	18.75	87.5	100	60	56.1351	34.7887	55.7093
	62	57	2	19										5.55172	6	5	5.6	6.33333	5.06222	6.4		95	93.75	72	67	62.5	100	91.6667	70	51.791	48.8155	54.2338
	63	51	2	18.5										6.10345	6.33333	5.8	6.4	5.66667	5.69469	7		100	81.25	100	52	75	100	100	80	51.5455	53.7294	53.941
	64	51	2	21.2										6.17241	7	5.8	6.6	6.33333	5.76951	6.4		95	93.75	72	62	68.75	100	100	90	46.3821	53.5374	58.573
	65	67	2	22										6.44828	7	5.6	6.2	6.33333	6.55994	7		95	100	84	72	93.75	100	100	100	48.2285	63.5793	55.3944
	66	76	1	25.3										6.44828	6.33333	6.2	6.6	6.33333	6.25217	7		95	81.25	100	97	75	87.5	100	100	56.3875	66.9572	42.3452
	67	68	1	23.5										6.86207	7	6.2	7	7	6.9256	7		95	100	100	77	50	50	100	95	62.5856	52.1667	42.7057
	68	68	1	26.2										6.62069	7	7	6.4	6.66667	6.03947	7		90	100	100	77	93.75	100	100	100	49.4232	66.2685	53.1978
	69	68	2	22.1										6.28571	6	6	6.2	6	6.2695	6.8		90	100	84	67	81.25	100	100	90	47.1119	58.0408	57.2651
	70	52	2	17.8										6.10345	6.33333	5.8	5.8	6.33333	6.33037	6.2		90	93.75	72	77	62.5	100	100	80	48.9376	53.1059	55.5771
	71	59	2	23.5										5.86207	6	5.6	6	6.33333	5.35522	6.6		80	93.75	84	62	56.25	62.5	91.6667	70	51.663	48.1225	46.4924
	72	38	1	22.2										5.65517	3	5.6	6.8	5.33333	5.42554	6.8		100	100	100	97	87.5	100	100	90	60.3187	64.524	47.6774
	73	50	2	21.5										7	7	7	7	7	6.97337	7		95	100	100	100	100	100	100	100	56.1382	71.1789	47.1933
	74	51	2	24.9										6.17241	5.66667	5.4	6.4	6.66667	6.19697	6.8		100	100	100	67	62.5	100	100	90	55.4865	53.1374	56.0308
	75	50	1	21.9										6.51724	6.66667	6.4	7	7	5.82984	7		100	100	100	72	50	100	100	70	60.5722	46.2756	54.6535
	76	33	1	21.1										6.86207	7	6.6	7	7	6.76037	7		100	100	100	62	75	100	100	80	55.7397	52.8217	55.7452
	77	38	2	21.6										6.75862	6.33333	6.4	7	7	6.77269	7		100	100	100	72	87.5	100	100	85	56.2804	58.8071	52.957
	78	37	2	21.8										6.82759	7	6.4	7	7	6.4686	7		90	100	100	82	75	100	100	85	53.8895	59.1125	52.519
	79	42	2	19.3										6.7931	7	6.4	6.4	7	6.84333	7		100	100	100	87	87.5	100	100	95	57.4576	63.912	50.1773
	80	32	2	17.3										6.86207	7	7	7	5.66667	6.95425	7		100	100	100	100	93.75	100	100	100	58.86	68.9494	47.1436
	81	40	2	20.5										3.75862	4	3.2	3.6	4	4.2174	4		90	100	80	40	75	100	100	45	49.4032	40.6402	61.5826
	82	56	1	24.2										5.96552	6.66667	5.6	5.4	6.33333	5.58996	6.6		90	100	84	82	62.5	100	100	85	51.7698	55.0855	54.918
	83	51	2	20.9										6.55172	6.33333	6.2	6.4	7	6.58823	6.8		95	100	84	95	62.5	100	100	85	56.7839	56.6972	51.5574
	84	47	2	18.7										6.93103	7	7	6.6	7	6.95662	7		100	100	100	100	100	100	100	100	58.5896	70.4399	46.7223
	85	46	2	19.5										5.27586	4	4.6	6.2	6.66667	4.30967	6.6		95	81.25	51	50	31.25	100	91.6667	65	45.7078	37.5305	59.1998
	86	46	2	19.5										6.27586	5	6	6.4	7	6.29407	6.6		95	87.5	62	72	75	100	91.6667	85	47.1626	56.5408	52.7416
	87	55	2	20.9										6.44828	5.66667	6	6.4	6.66667	6.60957	6.8		100	100	74	82	81.25	100	100	85	54.1987	57.425	53.6846
	88	53	2	22.2										5.62069	7	5.8	5	6.33333	4.78704	6.2		90	100	72	42	75	100	100	75	43.1282	47.6564	63.579
	89	54	2	31.6										5.24138	4.33333	4.8	4.8	6	5.6466	5.6		75	68.75	61	45	56.25	100	75	65	35.2027	49.3076	51.7714
	90	58	2	25.2										6.03448	6	5.8	6.4	6.66667	5.48611	6.4		85	100	72	62	43.75	100	100	50	50.4204	38.5783	60.3256
	91	59	2	22.6										5.54545	6	5.4	6	5.66667	5.08333			45	81.25	100	57	62.5	87.5	66.6667	60	34.0214	57.1612	44.4092
	92	65	2	22.1										6.25926	6.66667	6.8	6.8	6.66667	5.81944	5.5		95	100	100	92	100	100	100	100	54.5612	69.7323	48.9714
	93	45	2	17.9										5.48276	6	4	6	6	5.375	6		85	100	100	62	43.75	100	100	55	54.1865	41.6052	57.8792
	94	58	2	23.5										4.75	4.66667	4.8	5.4	5	4.75	3.75		95	81.25	62	30	12.5	62.5	83.3333	40	55.3945	23.5299	50.3929
	95	64	2	22.1										6.62069	7	6.6	6.4	7	6.375	6.8		100	100	100	97	87.5	100	100	100	58.539	66.9165	48.2317
GROUP	patient No	age	sex 1:M 2:F	BMI	AST	ALT	ALP	PLT	Use of PSL	dosage of PSL	Cirroris	comorbidities	CLDQ	Overall	abdominal	fatigue	sysytemic	activity	emotions	worry	SF-36	PF	RP	BP	GH	VT	SF	RE	MH	PCS	MCS	RCS	HCVRNA
CHC	1	69	2	27.3	60	86	268	13.6				1		6.31034	7	6.2	6.6	6.66667	5.75	6.4		90	93.75	100	92	50	100	91.6667	80	57.6847	55.3174	47.8216	1
	2	61	1	24.8	48	85	301	11.6				0		6.10345	6.66667	5	5.8	6.66667	6.25	6.6		90	100	100	67	75	100	100	75	52.7123	54.0076	55.2988	0
	3	63	1	25.9	61	56	683	5.5				0		6	5.66667	6.4	4.8	6.66667	6.125	6.4		95	87.5	62	45	75	100	100	90	40.3568	52.2054	61.5606	1
	4	64	1	19.8	120	142	253	12				0		5.68966	6.33333	6	5.6	6.66667	6.125	3.8		100	100	100	90	41.6667	100	100	75	63.5912	48.7394	51.4916	1
	5	68	1		23	24	330	27.2				0		5.58621	6	6	5	6	5.625	5.2		100	100	84	52	81.25	100	100	90	49.0579	53.8503	59.6571	0
	6	60	2	19.2	42	59	280	15.6				0		6.31034	6.66667	6.6	6.6	6.66667	5.875	6		100	100	100	62	62.5	100	100	75	57.1704	48.6445	56.3107	1
	7	69	2	22.4	22	9	505	11.3				1		4.53571	4.66667	3.6	4.8	5.33333	4.71429	4.4		50	100	61	40	56.25	100	100	55	25.6636	43.2314	69.0171	0
	8	60	2	19.9	16	12	220	26.4				0		5.7931	6.33333	5.8	6	6	5.5	5.6		95	93.75	100	47	68.75	100	100	60	53.4201	45.4782	57.5207	1
	9	44	1	26.9	47	66	248	22.9				0		6	6	6	6	6	6	6		77.7778	100	100	72	75	100	100	50	52.1546	50.737	53.9532	1
	10	62	2	20.8	37	41	392	11.5				0		6	5.66667	6.2	6.4	6.33333	5.625	6		95	87.5	100	57	87.5	100	100	70	52.0596	55.0556	53.2461	1
	11	76	2	25.2	33	22	360	25.7				1		5.03448	5.33333	4	4.8	6	5.25	5.2		45	50	52	52	56.25	100	91.6667	85	13.4078	60.6213	56.0801	1
	12	70	2	22.4	28	24	278	25.9				1		5.7931	5	5.2	6.2	5.66667	6.25	5.8		75	100	32	57	68.75	100	100	100	27.9007	54.4614	67.3557	1
	13	65	2	21.7	33	32	149	12.1				1		5.82759	5.66667	4.4	5.4	7	6.625	5.8		95	75	84	45	31.25	75	100	90	48.3899	44.1545	53.3388	1
	14	85	2	24.8	31	16		14.9				0		6.44828	6.66667	6.8	6.8	6.33333	6.5	5.6		100	100	100	62	87.5	100	100	95	52.5295	59.3914	55.734	1
	15	83	2	26.5	43	28	380	10.4				0		5.65517	6.33333	5.6	5.6	6	5.5	5.4		90	87.5	70	57	75	75	83.3333	80	48.532	53.6769	46.6041	1
	16	58	2	21	30	44	331	23.9				0		4.96552	5.66667	4.8	6	5.33333	4.125	4.8		95	100	72	62	75	100	100	80	48.6324	51.7301	58.9397	1
	17	61	1	26.3	64	71	630	6.4				1		6.41379	7	5.8	5.6	7	6.625	6.8		85	100	100	67	68.75	100	100	95	46.9718	58.0412	57.2997	1
	18	73	1	19.4	43	41	509	12.2				1		5.65517	6.33333	6	5.8	5	6	4.6		90	100	51	42	56.25	100	91.6667	75	41.041	42.4614	64.3449	1
	19	78	2	23.4	53	60	347	17.9				1		5.24138	4.66667	5.2	4.4	6	5.5	5.6		90	81.25	22	40	18.75	87.5	66.6667	75	38.9868	35.4917	55.3159	1
	20	83	2	21.3	36	23	193	14.3				1		3.58621	6	3.2	3.8	4.66667	2.75	3		65	0	42	15	6.25	100	16.6667	40	23.8429	40.7178	30.6646	1
	21	53	1											5.65517	6	5.6	5	6	5.75	5.8		100	100	84	67	81.25	100	100	80	53.7945	54.1702	55.7688	1
	22	60	1	16.7	131	140	312	13.1				1		5.44828	6	6.2	5	6.33333	4.75	5.4		90	100	72	57	75	100	100	80	45.1953	51.565	60.5221	0
	23	64	2		61	61	370	13.4				0		5.82759	6.66667	5.4	6.2	6	5.75	5.4		80	100	72	52	68.75	87.5	100	80	41.5592	50.2151	59.8235	1
	24	30	2	25.6	48	86	341	16.4				0		6.68966	6.66667	6.2	7	7	6.625	6.8		100	100	100	97	81.25	100	100	95	59.6993	64.2298	48.3759	1
	25	73	2	27.5	21	13	209	19				1		6.17241	6.66667	5.8	6.6	6.66667	5.875	6		90	87.5	100	57	68.75	75	75	80	54.3844	54.7973	41.5668	0
	26	75	2	23	49	41	147	12.2				0		2.65517	3	2	3.4	3.33333	2	3		25	12.5	31	25	18.75	37.5	0	35	17.3018	46.8253	13.8971	0
	27	66	2	21.1	25	17	231	20				0		6.37931	7	6.4	6.2	6.33333	6.25	6.4		95	100	100	52	62.5	100	91.6667	70	54.231	47.0284	56.1866	1
	28	53	1	28.2	54	241	24.6	24.6				1		5.58621	5.66667	5	5.6	5.66667	5.625	6		80	81.25	64	50	62.5	100	83.3333	70	38.8668	49.8955	54.9783	1
	29	73	1	23.3	49	49	436	11.2				1		5.68966	5.33333	5.4	5.6	5.66667	5.875	6		70	81.25	74	77	62.5	100	83.3333	85	38.2796	60.4984	49.7779	1
	30	81	2	23.5	21	22	137	17				0		4.96552	6.33333	4.6	4.6	4.66667	4.375	6		60	62.5	72	57	56.25	100	58.3333	85	28.9296	61.4029	44.1323	1
	31	69	2		29	24	314	23.8				1		4.82759	4.33333	4.6	4.6	5	5	5.2		40	62.5	62	45	31.25	75	75	65	22.5134	48.623	48.9677	1
	32	74	2											5.27586	6	5.6	5.8	5.66667	5.375	3.6		95	100	100	60	81.25	37.5	83.3333	75	64.611	52.6253	35.0145	1
	33	58	2	24.7	18	14	348	21.8						5.65517	6	4.8	5.6	6.33333	5.625	6		95	100	62	57	62.5	100	100	90	44.7451	49.5837	62.4206	0
	34	57	2	24.7										5.51724	5.66667	5.6	5.2	6.66667	5.125	5.6		95	100	61	72	68.75	100	100	90	47.2653	53.7212	58.7626	1
	35	68	1	21	39	43	432	15.2				0		5.31034	6.33333	5.2	6.4	5.66667	4	5.6		93.75	100	100	47	25	50	100	35	67.8185	26.6098	47.8511	1
	36	75	1	23.5	43	50	365	18				0		5.72414	6	5.6	5.8	6	5.75	5.4		80	62.5	74	55	68.75	75	50	60	47.1399	54.9982	31.3826	1
	37	63	2	16	67	46	201	13.4				0		5.06897	5.66667	4.6	5	6	5.125	4.6		95	100	84	57	81.25	87.5	100	75	52.2437	51.4714	55.0121	1
	38	59	2	25.6	23	28	294	19.2				0		5.82759	7	2.8	6.2	6	6.625	6.4		75	68.75	62	57	50	87.5	100	90	33.7571	53.6522	55.2626	0
	39	64	2	22.7	22	18	98	20.1				1		5.41379	6.33333	5.2	5.6	5.66667	4.625	6		95	93.75	100	67	56.25	100	100	65	57.0136	47.31	54.1952	0
	40	60	2		31	23	316	19.2				0		4.75862	5	4.6	5	5.33333	4.5	4.6		75	75	62	40	62.5	75	66.6667	70	38.5218	50.0329	45.0963	0
	41	60	2	19.1	59	73	275	14.3				0		6.13793	6.33333	6	6.4	6.66667	5.75	6.2		100	100	100	52	68.75	62.5	100	55	64.4343	42.2417	47.4836	1
	42	78	2	19.9	22	14	289	20.8				1		5.13793	5.33333	5	5.2	5.66667	5.125	4.8		85	100	51	45	68.75	75	91.6667	65	44.384	43.4646	56.4056	1
	43	43	2	20.7	18	10	169	20				0		5.17241	4.66667	4	5	6	5.5	5.8		95	68.75	52	62	56.25	75	91.6667	90	45.1911	52.6529	47.1045	0
	44	70	2	28.2	21	18	186	13.2				1		5.75862	6	6	5.6	6	5.75	5.4		75	25	62	52	62.5	100	25	60	35.7427	61.1664	24.7798	1
	45	65	2	22.4	289	301	409	10.1				0		5.2069	5.66667	5	4.6	5	5.75	5		90	100	61	45	50	100	100	75	42.9721	41.5178	65.6674	1
	46	68	2		23	24	330	27.2				0		5.58621	5.66667	5.6	5	6.33333	5.75	5.4		100	81.25	84	52	75	100	75	90	48.886	57.0239	48.4296	1
	47	66	2	22.3	22	22	248	26.1				0		4.89655	4.66667	4.6	5	5.66667	4.625	5.2		80	68.75	100	57	68.75	87.5	83.3333	60	48.2422	53.9902	43.0873	1
	48	62	2	20.1	28	19	263	17				1		5.04	6	6	5.4	6	4.28571	3		95	.	100	52	81.25	87.5	.	85	.	.	.	0
	49	54	1	26.4	21	20	140	18				1		6.13793	6.66667	5.6	6	6.33333	6.125	6.4		95	100	84	67	81.25	100	100	75	52.2328	53.713	55.9627	0
	50	83	2	21.5	42	23	209	15.7				1		3.89655	7	2.6	4	5	3	4		60	68.75	31	40	25	100	33.3333	40	30.643	38.4725	45.2315	1
	51	65	2	24.9	28	19		19.9				1		5.72414	6	5.4	5.6	6	5.375	6.4		80	93.75	52	77	62.5	87.5	91.6667	75	44.1745	52.2961	52.4734	0
	52	71	2	24.9	66	51	190	10.8				1		5.44828	6.33333	5.8	4.8	6.33333	4.75	5.8		85	100	74	57	81.25	87.5	100	85	43.8982	54.6882	57.4811	1
	53	61	2	31.6	22	19	124	15.6				0		5.62069	5	5.8	5.4	6.66667	5.5	5.6		95	81.25	74	67	68.75	87.5	83.3333	65	53.8367	51.2671	44.9422	0
	54	34	1	23.6	31	39	181	28.9				0		3.82759	5.66667	3.2	3.8	4.33333	3.375	3.8		80	25	100	45	37.5	50	25	30	57.4819	46.7733	9.49775	1
	55	68	2	22.4	24	21	205	15.6				1		4.27586	4.66667	4.4	4.2	5.66667	4.375	3		95	100	74	42	43.75	87.5	100	45	54.5853	31.9849	60.1839	0
	56	73	2	19.9	31	23		17.7				0		6.41379	7	6.6	6.4	7	6.125	6		100	100	100	52	81.25	100	100	75	54.3879	51.3076	57.2694	0
	57	53	2	21.7	22	19	260	19.1				1		5.5	7	5	5.4	6.66667	5.125	5.4		100	100	72	52	58.3333	100	100	55	54.2828	39.227	60.4292	0
	58	63	2	31.1	24	19	194	14.3				1		4.93103	6	5.4	6	6.33333	4.75	2.2		72.2222	100	52	47	43.75	87.5	100	50	39.8551	36.0137	63.6354	0
	59	66	1	26.7	49	53	236	13.5				1		4.96552	5.33333	5.4	5.2	5.33333	5.125	3.6		95	100	100	57	68.75	87.5	83.3333	85	54.8524	53.2278	49.7714	0
	60	73	2		24	18	159	17.2				1		6.10345	6.33333	5.8	6.6	7	5.625	6		100	100	100	82	75	87.5	100	75	62.5542	54.8086	47.8494	0
	61	65	1	19.4	18	18	121	16.7				0		5.55172	6.66667	5.2	5.2	6	5.75	5		85	100	84	62	87.5	100	100	85	44.2942	58.1699	58.1491
	62	84	1	23.7	21	10	235	13.2				1		3.7931	4.66667	2.6	4.6	5	3.875	2.8		60	50	62	30	37.5	87.5	58.3333	60	27.7049	46.7914	45.1266	0
	63	75	2	22.4	25	17	235	12.2				1		4.67857	7	4	3.8	5.66667	5	3.8		65	87.5	32	25	37.5	100	83.3333	90	19.5264	43.4177	69.1968	1
	64	77	2		36	42	169	16.8				1		5.62069	5.66667	5.6	6	6	5.125	5.8		85	81.25	80	57	62.5	62.5	100	75	49.228	50.0658	47.2336	1
	65	65	1	21.7	40	28	422	20.3				1		2.75862	2.33333	2	3.2	3.66667	3.25	2		55	12.5	31	30	12.5	50	16.6667	15	33.6569	36.1543	17.527	0
	66	70	1	20.8	15	8	258	21.5				1		4.75862	5	4.4	4.4	4.66667	4.875	5.2		55	50	42	40	37.5	62.5	58.3333	60	27.8632	47.1644	38.9737	1
	67	37	2	29	17	16	310	17.4				1		4.72414	5.33333	4.6	5	5.33333	4.5	4.2		70	81.25	100	52	37.5	100	83.3333	65	42.3156	46.9308	53.3824	0
	68	65	2	27.8	14	10	252	12				1		5.62069	6.66667	5	5.6	6	5.25	6		50	50	100	40	50	100	50	60	29.1626	56.6258	39.9399	0
	69	79	2	20.5	27	14	317	13.3				1		4.96552	7	3	5.6	5	4.5	5.8		20	81.25	52	30	25	75	100	50	11.47	38.4697	66.3973	0
	70	33	1	24	18	16	290	17.8				0		5.24138	6.33333	5.6	6	5	4.875	4.2		100	100	70	62	81.25	50	91.6667	60	62.5622	46.4817	41.8994	1
	71	69	2	21.3	25	17	373	19.1				1		5.58621	5	5.8	5.8	5.66667	5.625	5.4		45	100	52	52	50	62.5	100	70	27.6283	46.3502	59.4291	1
	72	59	2	19.9	23	13	284	18.1				1		5.41379	6.33333	4.8	6	6	5.875	3.8		70	87.5	84	62	50	87.5	91.6667	85	39.6558	53.4709	53.6915	0
	73	68	2	23.1	15	13	352	14.7				0		5.68966	6.66667	5.2	5.4	5.33333	6	5.6		90	100	72	57	62.5	100	100	95	43.0666	52.1728	62.1961	0
	74	72	2	23	26	19	217	18.6				1		5.41379	5.66667	4.8	5.2	5.66667	5.125	6.4		95	100	62	67	62.5	62.5	91.6667	70	56.8155	45.9563	47.0288	0
	75	70	2	22	22	20	285	35.3				1		5.48276	6.33333	5	5.8	6.33333	4.875	5.6		85	100	100	67	75	100	100	80	49.371	55.9429	56.047	1
	76	52	2	20	24	26	133	27.1				1		6.41379	6.66667	6.2	6.8	7	6.25	6		95	100	100	52	93.75	87.5	100	90	50.7082	58.183	54.5559	1
	77	72	2	20	37	31	269	19.4				1		5.44828	6.33333	5.4	6	6.33333	4.75	5		95	100	74	52	50	100	100	60	51.6346	39.3057	61.5446	1
	78	63	2	22.1	21	15		13.3				1		5.55172	5.66667	5	5.6	6	5.5	5.8		85	100	72	57	68.75	87.5	100	80	44.9963	50.3802	58.2411	1
	79	76	2	20	27	15	250	14.6				0		5.03448	6	5.2	6	5.66667	4.25	4.2		55	43.75	100	52	68.75	75	58.3333	60	35.798	61.9173	30.3894	0
	80	51	2	19.1	23	23	271	21.2				1		5.41379	5.33333	4.6	5.6	5.33333	5.375	6.2		95	58.3333	41	52	50	87.5	91.6667	75	41.1135	46.9884	50.9232	0
	81	75	2	20.8	32	18	221	15				1		6.44828	6.66667	6.4	6.6	5.33333	6.375	7		75	68.75	52	42	56.25	100	100	80	28.6646	49.8173	61.767	1
	82	78	1	16.2	21	16	332	16.6				0		6.58621	7	6.8	6.4	7	6.75	5.8		95	100	100	62	87.5	100	100	90	50.9678	58.9341	55.9279	0
	83	55	2	21.9	21	16	251	16.9				0		6.13793	6	6.2	6	6.66667	6.125	6		100	100	100	67	93.75	100	100	90	54.1345	60.5897	53.9242	1
	84	79	2	23.6	26	21	122	12.7				1		5.55172	6.33333	5.4	5.6	5.66667	5.5	5.2		55	75	52	57	62.5	100	75	80	24.0668	58.0191	53.6161	1
	85	68	2	21.6	26	18	407	12.8						6.72414	6.66667	6.4	6.8	7	6.625	7		.	100	61	90	75	100	100	85	.	.	.	1
	86	77	1	18.3	19	17		20				1		4.89655	4.33333	5	6.6	6	4.125	4		90	75	84	40	50	100	83.3333	45	49.3731	39.8599	52.4283	1
	87	61	2	25.2	20	14	456	24.9				1		4.24	5	4.25	4.2	5.5	4	3.75		88.8889	62.5	74	35	56.25	62.5	50	55	50.9683	45.4573	32.3828	1
	88	76	2	24.4	17	11	190	249				1		5.03448	6.66667	4	5.2	5	5	5		45	37.5	52	45	62.5	62.5	58.3333	55	23.935	56.7766	33.1847	1
